# Supplementary material
Source: PubMed Central journal article supplement (PMC8485503)

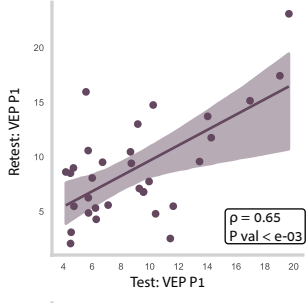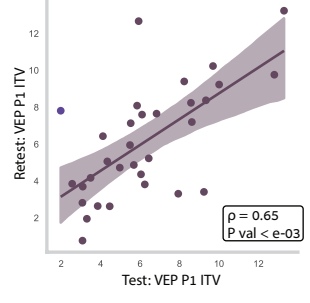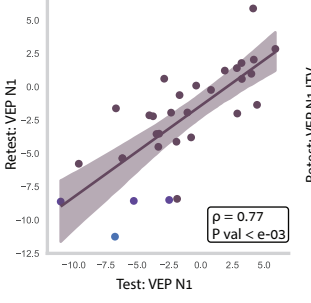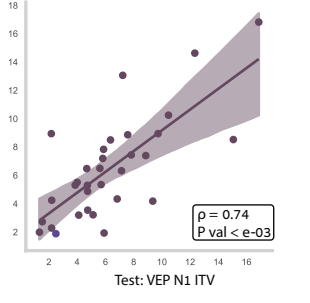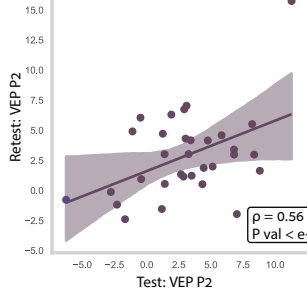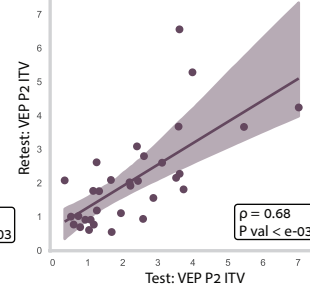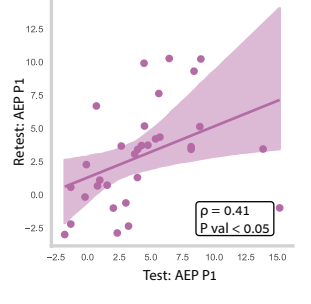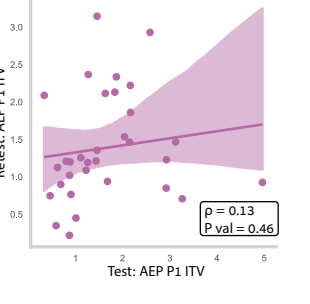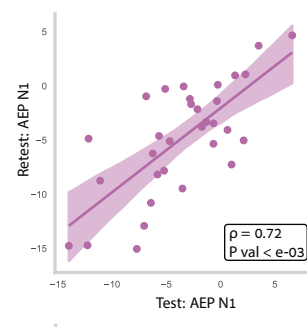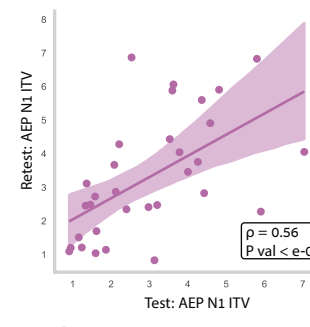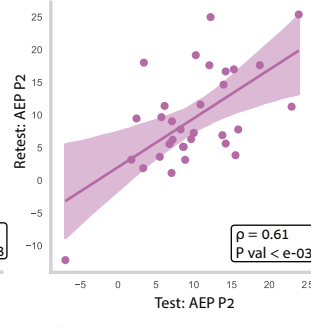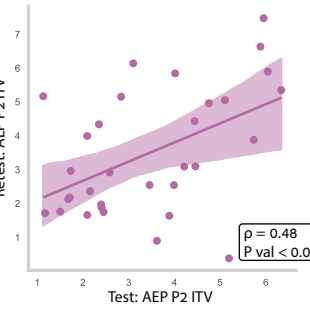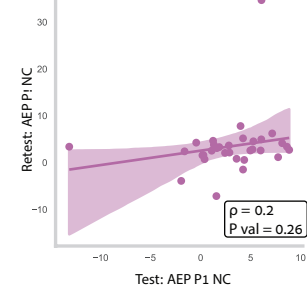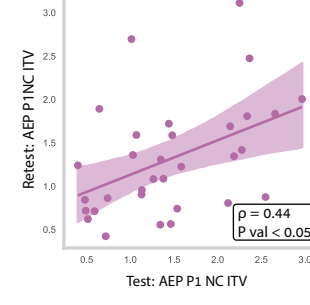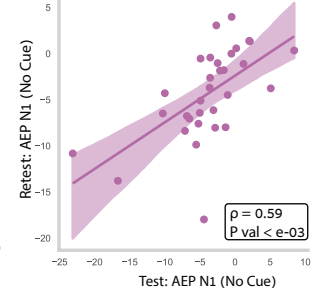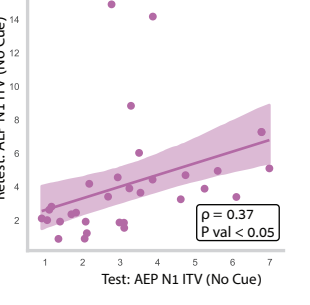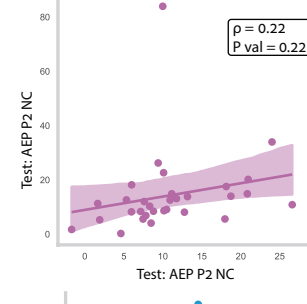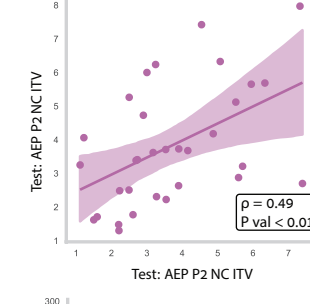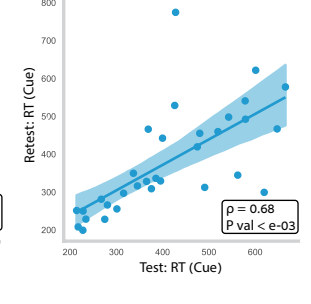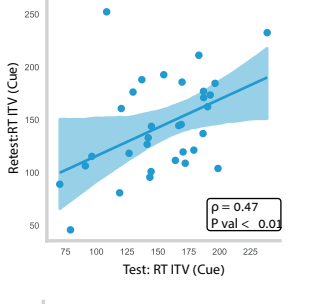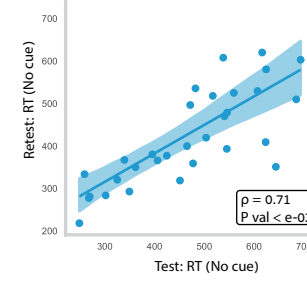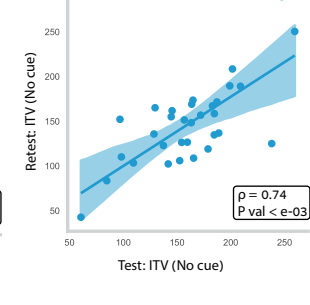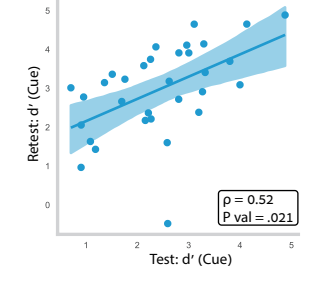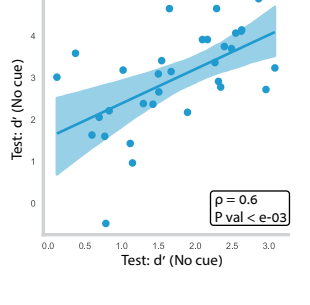

Supplement: 11689_2021_9383_MOESM1_ESM.pdf [file 11689_2021_9383_MOESM1_ESM.pdf]
