# Supplementary material
Source: PubMed Central journal article supplement (PMC8485503)

# clinical scores correlation matrix

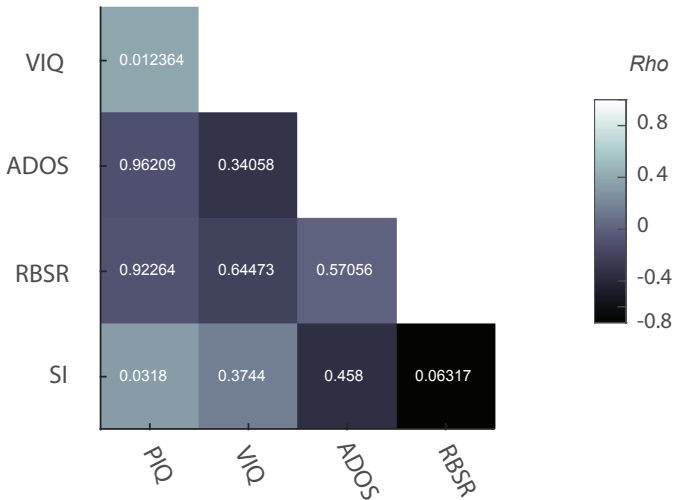

Supplement: 11689_2021_9383_MOESM2_ESM.pdf [file 11689_2021_9383_MOESM2_ESM.pdf]
